# Supplementary material for: Redox regulation of electrofluorochromic behavior for an AIEgen-doped PVA hydrogel based on a ferrocene derivate
Source: Royal Society of Chemistry journal article supplement (doi:10.1039/d3nj05883b), 2024-01-01
Supplement: d3nj05883b1.pdf [file d3nj05883b1.pdf]

## **Redox regulation of electrofluorochromic behavior for**

### **AI Egen-doped PVA hydrogel based on ferrocene derivate**

Shang Zhang<sup>a</sup>, Qihong Li<sup>a,\*</sup>, Hao Liu<sup>a</sup>, Xueshu Li<sup>a</sup>, Xuemei Wang<sup>a,b</sup>, Xueqin Du<sup>b</sup>,  
Cuiling Lv<sup>a</sup>, Zhaodong Wang<sup>c,\*</sup>, Aixiang Li<sup>a</sup>, Lin Niu<sup>d</sup>

<sup>a</sup> *School of Materials Science and Engineering, Shandong University of Technology, Zibo, Shandong  
255049, PR China*

<sup>b</sup> *College of agricultural engineering and food science, Shandong University of Technology, Zibo,  
Shandong 255049, PR China*

<sup>c</sup> *DEzhou Linglong Tire Co., Ltd, Dezhou, Shandong 253000, PR China*

<sup>d</sup> *School of Chemistry and Chemical Engineering, Shandong University, Jinan, Shandong 250000, PR  
China*

**\*Corresponding author: Qihong Li**

**E-mail:** qhli@sdut.edu.cn (Qihong Li)

**Tel:** +86 13864308349

**Fax:** +86-533-2781665

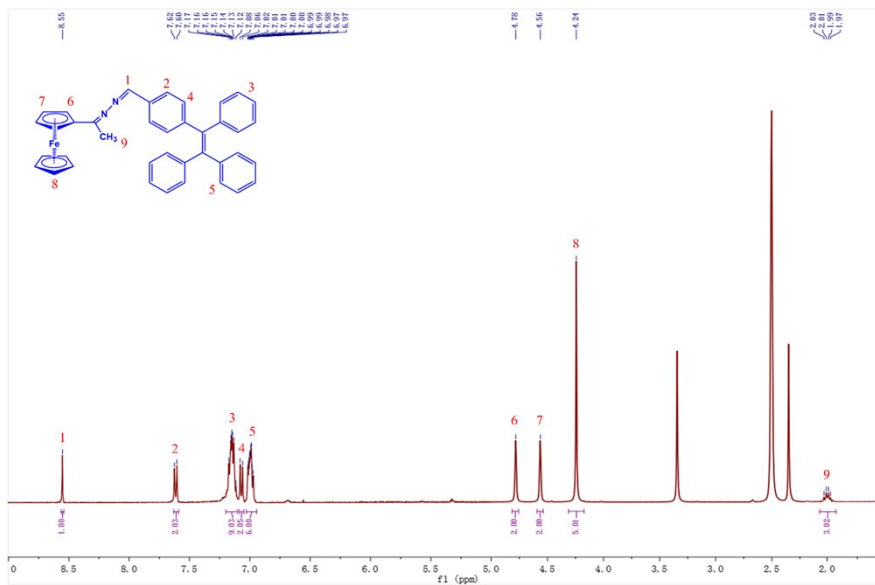

**Figure S1** The  $^1\text{H}$  NMR of FcMe-TPE ( $\text{DMSO-}d_6$ ).

$^1\text{H}$  NMR (400 MHz,  $\text{DMSO-}d_6$ ):  $\delta$  8.55 (s, 1H), 7.61 (d,  $J = 8.2$  Hz, 2H), 7.15 (dt,  $J = 7.2, 4.7$  Hz, 9H), 7.07 (d,  $J = 8.2$  Hz, 2H), 6.99 (tdd,  $J = 7.4, 5.0, 1.8$  Hz, 6H), 4.78 (s, 2H), 4.56 (s, 2H), 4.24 (s, 5H), 2.00 (q,  $J = 7.0, 6.5$  Hz, 3H).

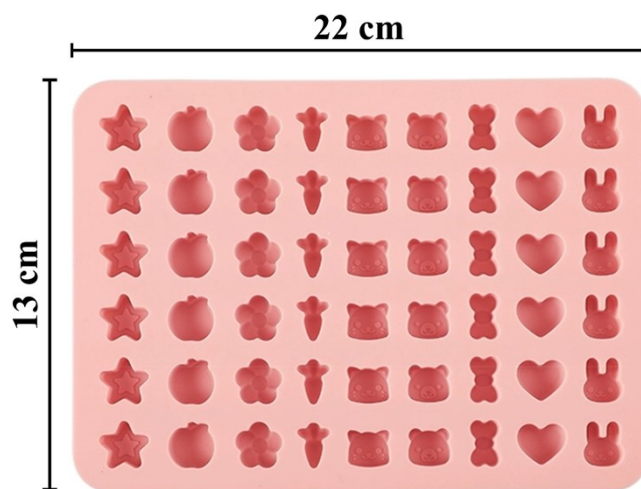

**Figure S2** Photograph for silicone mold.

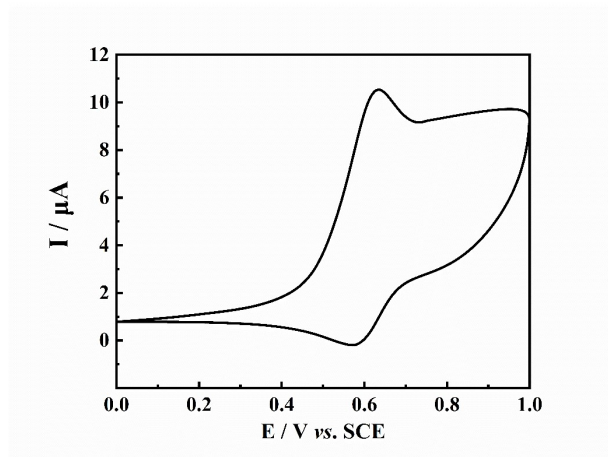

**Figure S3** CV curve of FcMe-TPE in degassed DMF solution with a rate of 10 mV/s using  $\text{Bu}_4\text{NPF}_6$  as electrolyte.

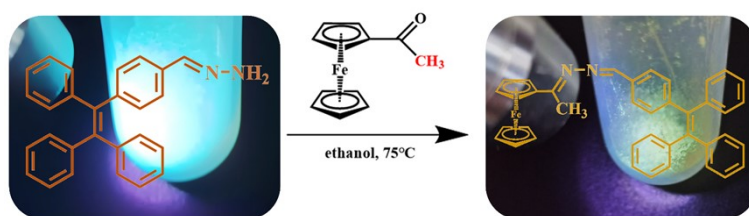

**Figure S4** Illustration of fluorescence quenching phenomenon.

|          |                               |                               |                             |                             |                               |                               |
|----------|-------------------------------|-------------------------------|-----------------------------|-----------------------------|-------------------------------|-------------------------------|
| Fc       |                               |                               |                             |                             |                               |                               |
|          | 46a<br>E = -0.2211<br>HOMO-2  | 47a<br>E = -0.1903<br>HOMO-1  | 48a<br>E = -0.1903<br>HOMO  | 49a<br>E = -0.0093<br>LUMO  | 50a<br>E = -0.0093<br>LUMO+1  | 51a<br>E = 0.0552<br>LUMO+2   |
| TPE      |                               |                               |                             |                             |                               |                               |
|          | 86a<br>E = -0.2406<br>HOMO-2  | 87a<br>E = -0.2370<br>HOMO-1  | 88a<br>E = -0.1954<br>HOMO  | 89a<br>E = -0.0442<br>LUMO  | 90a<br>E = -0.0085<br>LUMO+1  | 91a<br>E = -0.0079<br>LUMO+2  |
| FcMe-TPE |                               |                               |                             |                             |                               |                               |
|          | 151a<br>E = -0.2248<br>HOMO-2 | 152a<br>E = -0.2241<br>HOMO-1 | 153a<br>E = -0.2171<br>HOMO | 154a<br>E = -0.0795<br>LUMO | 155a<br>E = -0.0508<br>LUMO+1 | 156a<br>E = -0.0289<br>LUMO+2 |

**Figure S5** HOMOs and LUMOs (HOMO, HOMO-1, HOMO-2, LUMO, LUMO+1 and LUMO+2) and energy levels of ferrocene groups, tetraphenylethene groups and FcMe-TPE.

The high symmetry of Fc resulting in its HOMO-1 was close in energy to HOMO and LUMO+1 was close in energy to LUMO. The electronic transitions for the FcMe-TPE were arranged in descending order of contribution and presented in Table S1. For FcMe-TPE, the absorption band mainly originated from HOMO-2 to LUMO electronic transition.

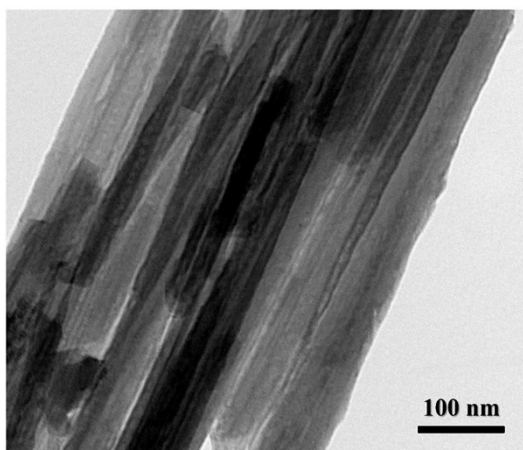

**Figure S6** TEM image of PVA/FcMe-TPE hydrogel.

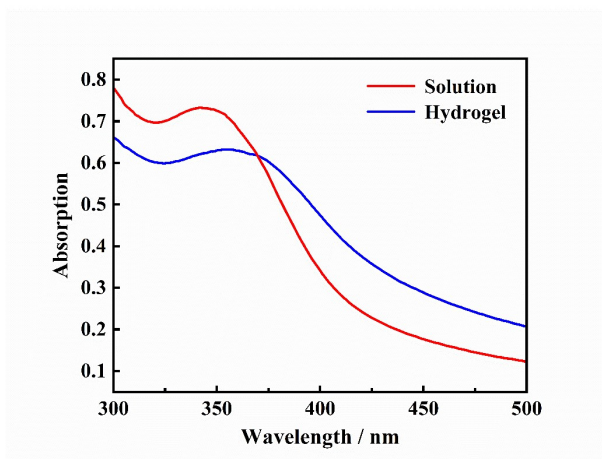

**Figure S7** The UV-Vis absorption spectra of FcMe-TPE in solution and hydrogel.

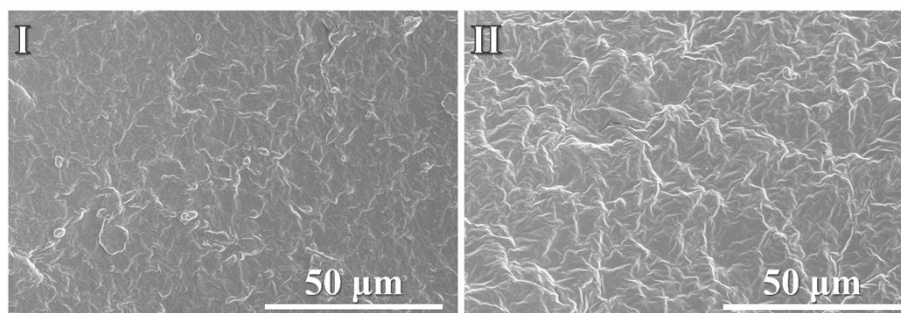

**Figure S8** SEM images of PVA/FcMe-TPE + PA hydrogel: (I) surface and (II) sectional view.

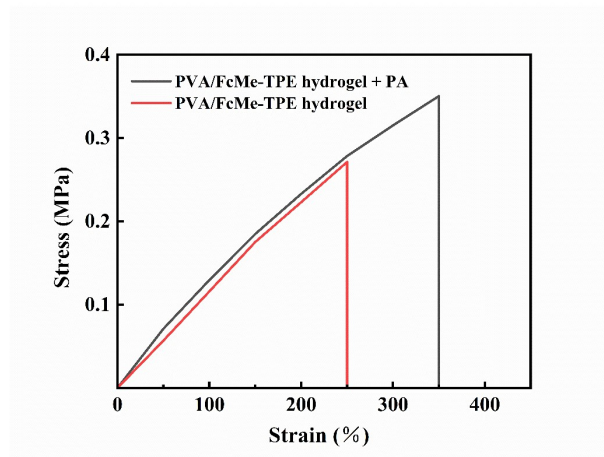

**Figure S9** Stress-strain curve of PVA/FcMe-TPE hydrogel with/without PA.

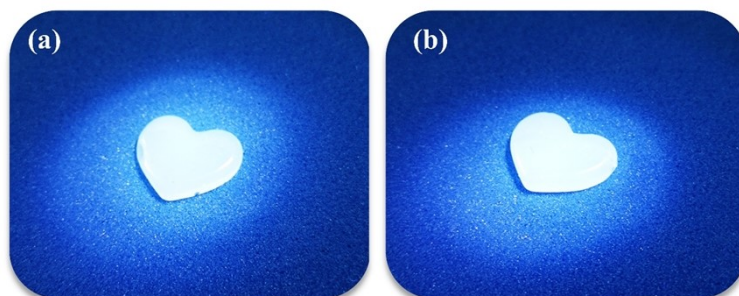

**Figure S10** Optical images of hydrogel under UV light without PA (a) and with PA (b) after applying voltage.

**Table S1 The contributions of orbital transition for FcMe-TPE in all excited states.**

| <b>Excited state</b> | <b>Energy /eV</b> | <b>Wavelength h /nm</b> | <b>Oscillator strength</b> | <b>Spin multiplicity</b> | <b>Major contribution</b>                                                                                                                                   |
|----------------------|-------------------|-------------------------|----------------------------|--------------------------|-------------------------------------------------------------------------------------------------------------------------------------------------------------|
| 8                    | 3.3855            | 366.22                  | 0.00240                    | 1                        | H-4 -> L 71.7%,<br>H-5 -> L 13.9%,<br>H-4 -> L+1 6.4%                                                                                                       |
| 9                    | 3.5364            | 350.59                  | 0.04910                    | 1                        | H-2 -> L 43.4%,<br>H-1 -> L+8 6.4%,<br>H-2 -> L+10 5.6%,<br>H -> L 5.4%                                                                                     |
| 10                   | 3.5717            | 347.13                  | 0.00010                    | 1                        | H-1 -> L 24.7%,<br>H-5 -> L+8 18.0%,<br>H-1 -> L+10 15.4%,<br>H-1 -> L+9 9.1%,<br>H -> L+8 6.8%,<br>H-1 -> L+4 6.7%,<br>H-2 -> L+8 6.4%,<br>H-4 -> L+8 5.6% |
| 11                   | 3.8896            | 318.76                  | 0.34560                    | 1                        | H -> L+1 77.1%,<br>H-2 -> L+1 18.7%                                                                                                                         |
